# Supplementary material for: Bufei Jiedu Formula enhances CD40 activation and macrophage polarization to eliminate intracellular MRSA persisters
Source: Front Immunol. 2025 Jul 17;16:1623182. doi: 10.3389/fimmu.2025.1623182 (PMC12310625; doi:10.3389/fimmu.2025.1623182)
Supplement: Supplementary file 9 [file Table4.xlsx]

## Sheet: Supplementary Table 4
Supplementary Table 4: Detailed information on the 20 commercially available compounds.
Compounds	Formula	CAS No.	Lot No.	Purity	Manufacturer
Monotropein	C16H22O11	5945-50-6	A0532	HPLC≥98%	CHENGDU MUST BIO-TECHNOLOGY CO., LTD
Gastrodin	C13H18O7	62499-27-8	A0138	HPLC≥98%	CHENGDU MUST BIO-TECHNOLOGY CO., LTD
Deacetylasperulosidic acid	C16H22O11	14259-55-3	A0730	HPLC≥98%	CHENGDU MUST BIO-TECHNOLOGY CO., LTD
Protocatechuic acid	C7H6O4	99-50-3	A0617	HPLC≥98%	CHENGDU MUST BIO-TECHNOLOGY CO., LTD
Deacetyl asperulosidic acid methyl ester	C17H24O11	52613-28-2	A1079	HPLC≥98%	CHENGDU MUST BIO-TECHNOLOGY CO., LTD
Scandoside methyl ester	C17H24O11	27530-67-2	B0346	HPLC≥98%	CHENGDU MUST BIO-TECHNOLOGY CO., LTD
Sesamoside	Cl7H24O12	117479-87-5	A0495	HPLC≥98%	CHENGDU MUST BIO-TECHNOLOGY CO., LTD
Esculetin	C9H6O4	305-01-1	A0021	HPLC≥98%	CHENGDU MUST BIO-TECHNOLOGY CO., LTD
Vicenin-II	C27H30O15	23666-13-9	A1609	HPLC≥98%	CHENGDU MUST BIO-TECHNOLOGY CO., LTD
Shaftoside	C26H28O14	51938-32-0	A0792	HPLC≥98%	CHENGDU MUST BIO-TECHNOLOGY CO., LTD
Loliolide	C11H16O3	5989-02-6	CFN92750	≥98%	ChemFaces
Neotuberostemonine	C22H33NO4	143120-46-1	A1572	HPLC≥98%	CHENGDU MUST BIO-TECHNOLOGY CO., LTD
Calycosin	C16H12O5	20575-57-9	A0514	HPLC≥98%	CHENGDU MUST BIO-TECHNOLOGY CO., LTD
Formononetin	C16H12O4	485-72-3	A0232	HPLC≥98%	CHENGDU MUST BIO-TECHNOLOGY CO., LTD
Astragaloside IV	C41H68O14	84687-43-4	A0070	HPLC≥98%	CHENGDU MUST BIO-TECHNOLOGY CO., LTD
Astragaloside II	C43H70O15	84676-89-1	A0072	HPLC≥98%	CHENGDU MUST BIO-TECHNOLOGY CO., LTD
Atractylenolide Ⅱ	C15H20O2	73069-14-4	A0373	HPLC≥98%	CHENGDU MUST BIO-TECHNOLOGY CO., LTD
Corosolic acid	C30H48O4	4547-24-4	A0453	HPLC≥98%	CHENGDU MUST BIO-TECHNOLOGY CO., LTD
Poricoic acid B	C30H44O5	137551-39-4	A1561	HPLC≥98%	CHENGDU MUST BIO-TECHNOLOGY CO., LTD
Isololiolide	C11H16O3	38274-00-9	CFN95106	>95%	ChemFaces
