# Supplementary material for: Bufei Jiedu Formula enhances CD40 activation and macrophage polarization to eliminate intracellular MRSA persisters
Source: Front Immunol. 2025 Jul 17;16:1623182. doi: 10.3389/fimmu.2025.1623182 (PMC12310625; doi:10.3389/fimmu.2025.1623182)
Supplement: Supplementary file 10 [file Table5.xlsx]

## Sheet: Supplementary Table 5
Supplementary Table 5：Binding energy of the active compounds to CD40
Active compound	Binding Energy
Atractylenolide Ⅱ	-5.57
Formononetin	-5.62
Esculetin	-4.81
Protocatechuic acid	-3.94
Scandoside methyl ester	-2.36
Sesamoside	-1.82
Shaftoside	-3.08
Deacetylasperulosidic acid	-2.45
Vicenin-II	-2.92
Deacetyl asperulosidic acid methyl ester	-3.76
